# Supplementary material
Source: publisher figshare collection journal article supplement (https://acs.figshare.com/ndownloader/files/14222057)
Supplement: Supplementary file 1 [file 14222057]

# Supporting Information

## Efficient ultrathin organic solar cells with sustainable $\beta$ -carotene as electron donor

*Varun Vohra,\* Takayuki Uchiyama, Shusei Inaba, Yoshiko Okada-Shudo*

Department of Engineering Science, University of Electro-Communications, 1-5-1 Chofugaoka,  
Chofu City, 182-8585 Tokyo, Japan

### Corresponding Author

\* Email: varun.vohra@uec.ac.jp

Number of pages: 3

Number of figures: 2

Number of tables: 1

### Table of Contents:

I. Photovoltaic properties of inverted OSCs prepared using CF as a deposition solvent..... S2  
Figure S1: J-V curves OSCs with variable active layer thicknesses or electron acceptor.

II. Optoelectronic properties of thin active layers prepared with various deposition solvents.....S3  
Figure S2: PL spectra of bCar and bCar:PC<sub>71</sub>BM thin films.  
Table S1: PL quenching rates and photovoltaic parameters of 30 nm-thick bCar:PC<sub>71</sub>BM OSCs.

**I. Photovoltaic properties of inverted OSCs prepared using CF as a deposition solvent:**

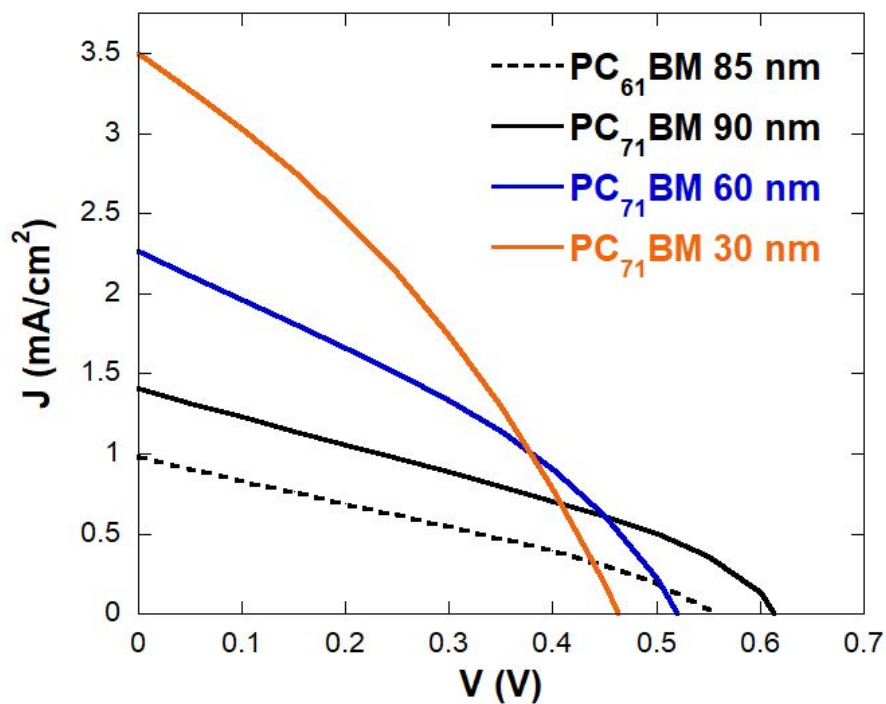

**Figure S1.** J-V curves OSCs fabricated with CF as the deposition solvent and with active layer thickness around 90 nm (black), 60 nm (blue) and 30 nm (orange). The dashed and solid black curves correspond to OSCs prepared with PC<sub>61</sub>BM and PC<sub>71</sub>BM as the electron acceptor, respectively.

## II. Optoelectronic properties of thin active layers prepared with various deposition solvents

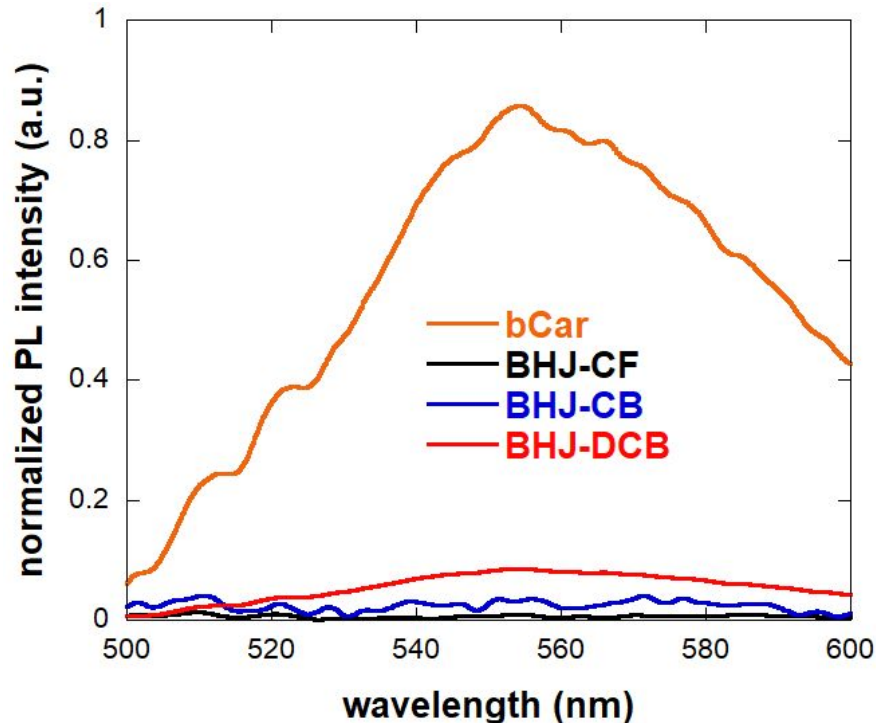

**Figure S2.** PL spectra of bCar, BHJ-CF, BHJ-CB and BHJ-DCB excited and normalized to their absorption at 450 nm.

**Table S1.** Impact of processing solvent on the properties of ultrathin (~30 nm) active layers.

| Solvent | bCar PLQR* (%) | J <sub>sc</sub> (mA/cm <sup>2</sup> ) | V <sub>oc</sub> (V) | FF (%) | PCE (%)     |
|---------|----------------|---------------------------------------|---------------------|--------|-------------|
| CF      | 99             | 3.51                                  | 0.46                | 32.9   | 0.53 ± 0.01 |
| CB      | 97             | 3.27                                  | 0.51                | 34.8   | 0.58 ± 0.02 |
| DCB     | 90             | 2.64                                  | 0.51                | 33.3   | 0.45 ± 0.02 |

\* bCar PL quenching ratio calculated using the integrations of the PL spectra displayed in

**Figure S2** between 520 nm and 600 nm
